# Supplementary material for: Insights into Drug Cardiotoxicity from Biological and Chemical Data: The First Public Classifiers for FDA Drug-Induced Cardiotoxicity Rank
Source: PubMed Central journal article supplement (PMC10900289; doi:10.1021/acs.jcim.3c01834), 2024-02-01
Supplement: ci3c01834_si_002.pdf [file ci3c01834_si_002.pdf]

# Supporting Information

## Insights into Drug Cardiotoxicity from

## Biological and Chemical Data: The

## First Public Classifiers for FDA

## DICTrank

*Srijit Seal<sup>\*1</sup>, Ola Spjuth<sup>2</sup>, Layla Hosseini-Gerami<sup>3</sup>, Miguel García-Ortegón<sup>4</sup>, Shantanu Singh<sup>1</sup>,  
Andreas Bender<sup>4</sup>, Anne E. Carpenter<sup>1</sup>*

<sup>1</sup>Imaging Platform, Broad Institute of MIT and Harvard, Cambridge, MA 02142, US

<sup>2</sup>Department of Pharmaceutical Biosciences and Science for Life Laboratory, Uppsala University, Box 591, SE-75124, Uppsala, Sweden

<sup>3</sup> Ignota Labs, County Hall, Westminster Bridge Rd, SE1 7PB, London, United Kingdom

<sup>4</sup> Yusuf Hamied Department of Chemistry, University of Cambridge, Lensfield Rd, CB2 1EW, Cambridge, United Kingdom

Documentation: [https://broad.io/DICTrank\\_Predictor](https://broad.io/DICTrank_Predictor)

Code: <https://github.com/srijitseal/DICTrank>

Datasets: 10.6084/m9.figshare.24312274

\*Correspondence:

[seal@broadinstitute.org](mailto:seal@broadinstitute.org)

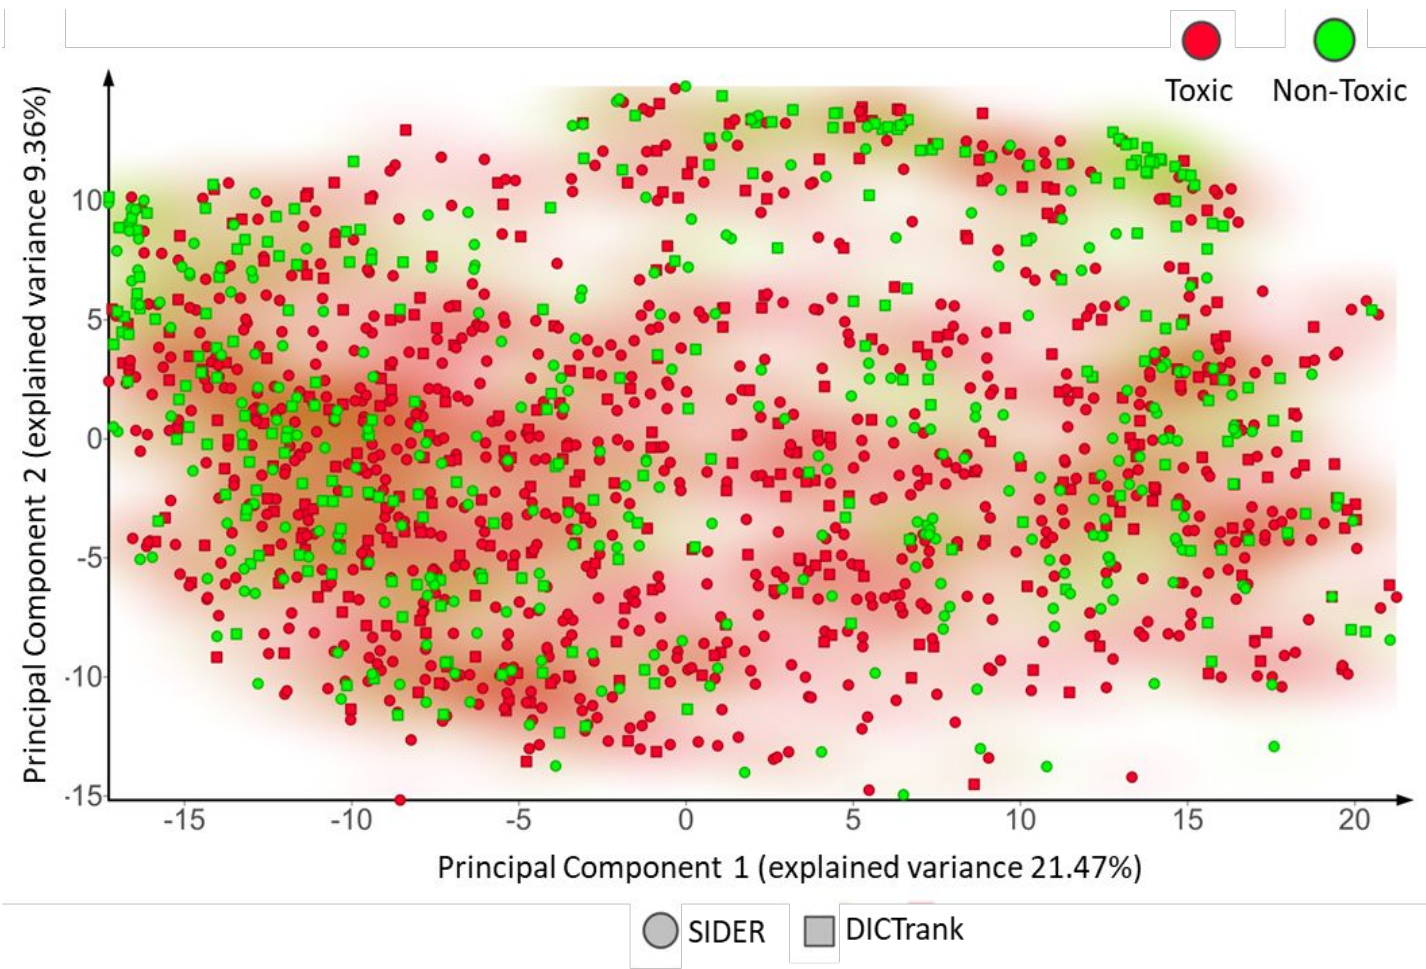

Figure S1: The chemical space of all 1020 DICTrank compounds and the remaining 546 unique compounds in SIDER as defined by FragFP fingerprints (chemical fingerprints) in a principal component analysis. SIDER and DICTrank compounds fairly overlap (with the PCA explained variance of 21.47%).

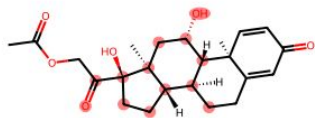

prednisolone acetate

['Cardiac disorders']

Additional Data: ['approved']

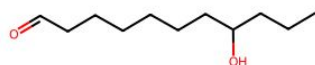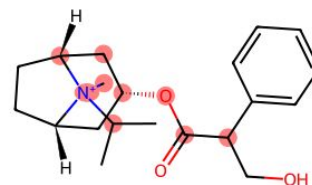

ipratropium

['Cardiac disorders']

Additional Data: ['approved', 'experimental']

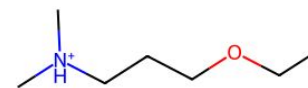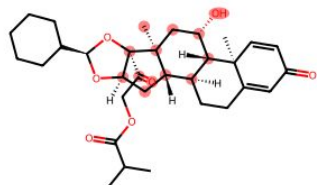

ciclesonide

['Cardiac disorders']

Additional Data: ['approved', 'investigational']

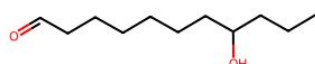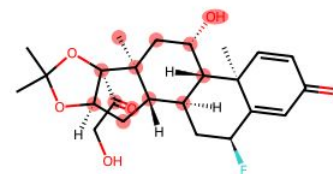

flunisolide

['Cardiac disorders']

Additional Data: ['approved', 'investigational']

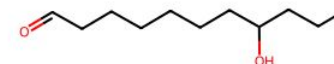

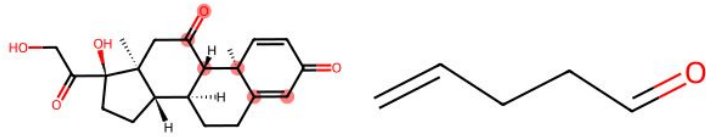

prednisone

['Cardiac disorders']

Additional Data: ['approved']

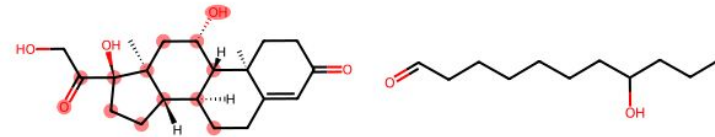

hydrocortisone

['Cardiac disorders']

Additional Data: ['approved']

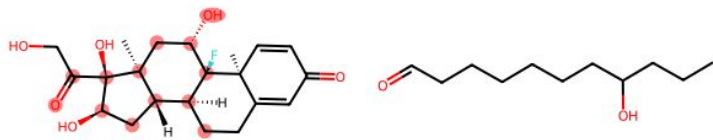

triamcinolone

['Cardiac disorders']

Additional Data: ['approved']

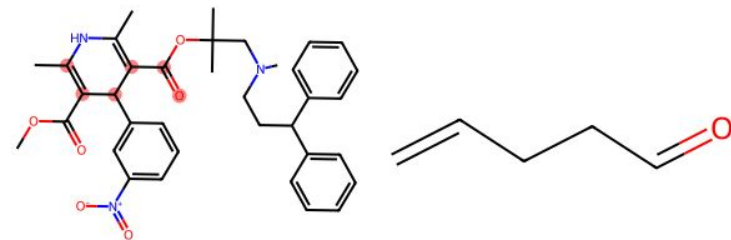

lercanidipine

['Cardiac disorders']

Additional Data: ['approved', 'investigational']

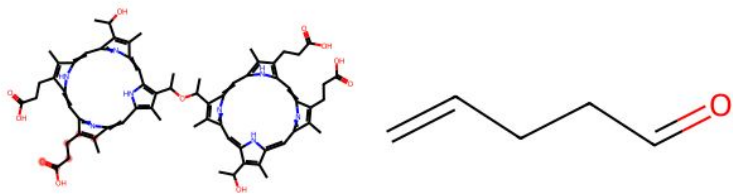

dihematoporphyrin ether

['Cardiac disorders']

Additional Data: ['investigational']

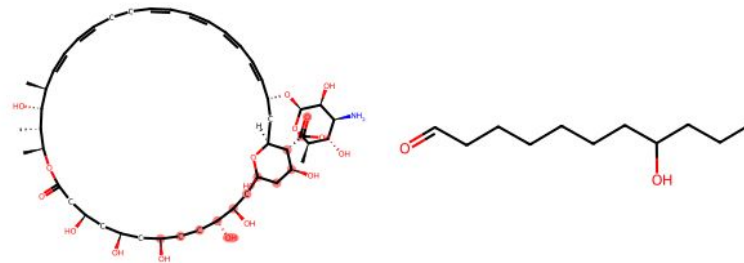

nystatin

['Cardiac disorders']

Additional Data: ['approved']

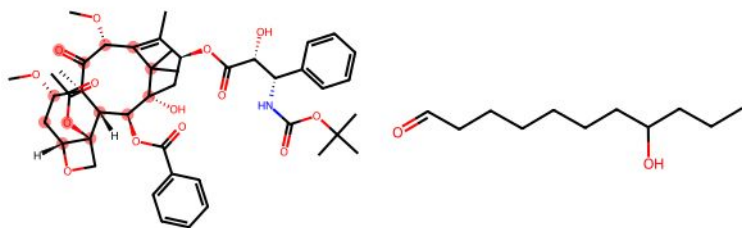

cabazitaxel

['Cardiac disorders']

Additional Data: ['approved']

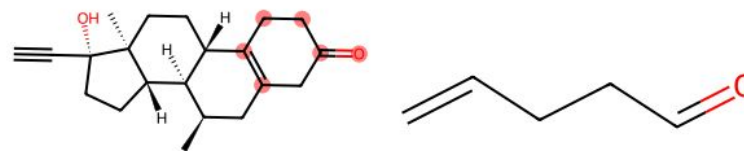

tibolone

['Cardiac disorders']

Additional Data: ['approved', 'investigational']

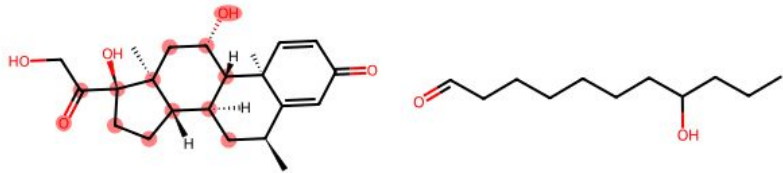

methylprednisolone

['Cardiac disorders']

Additional Data: ['approved']

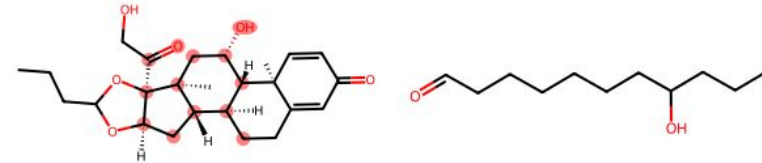

budesonide

['Cardiac disorders']

Additional Data: ['approved']

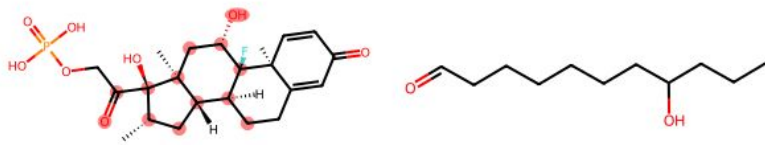

betamethasone phosphate

['Cardiac disorders']

Additional Data: ['approved']

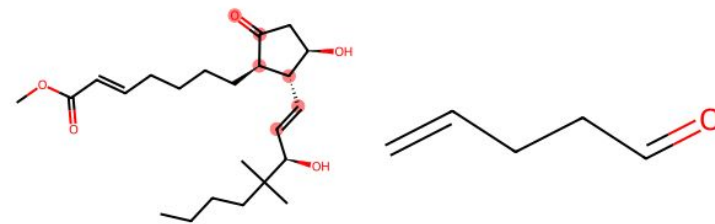

gemeprost

['Cardiac disorders']

Additional Data: ['approved', 'withdrawn']

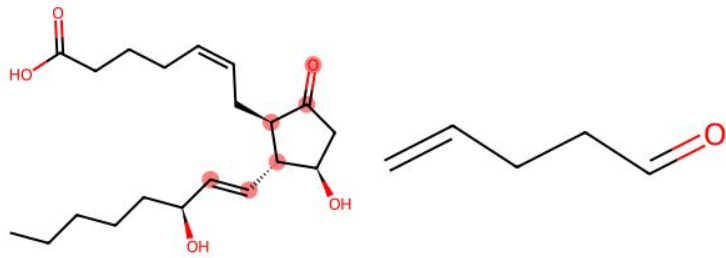

dinoprostone

['Cardiac disorders']

Additional Data: ['approved']

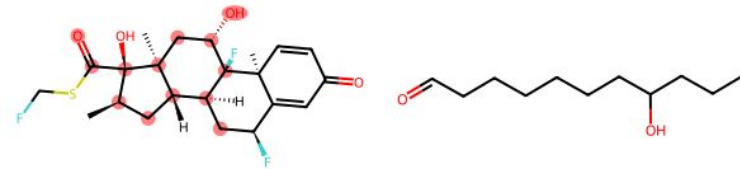

fluticasone

['Cardiac disorders']

Additional Data: ['approved', 'experimental']

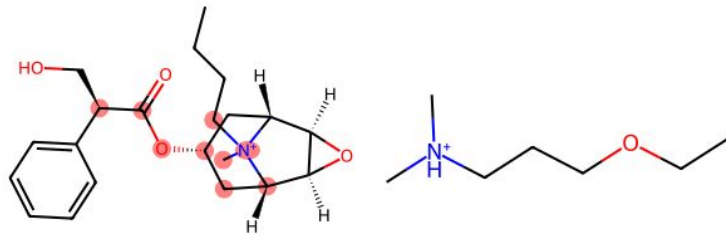

butylscopolamine

['Cardiac disorders']

Additional Data: ['approved', 'investigational']

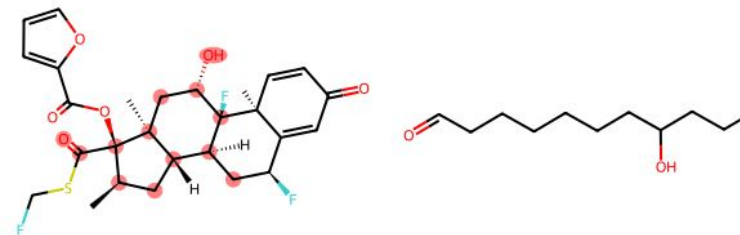

fluticasone furoate

['Cardiac disorders']

Additional Data: ['approved']

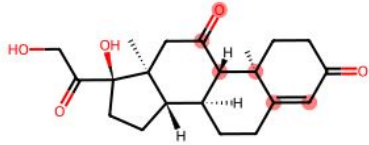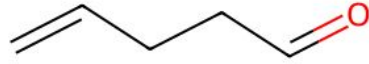

cortisone

['Cardiac disorders']

Additional Data: ['experimental']

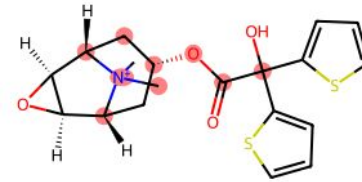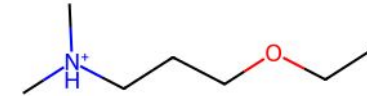

tiotropium

['Cardiac disorders']

Additional Data: ['approved']

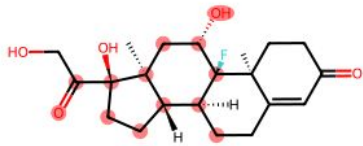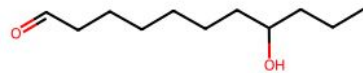

fludrocortisone

['Cardiac disorders']

Additional Data: ['approved', 'investigational']

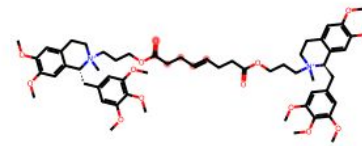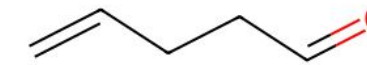

mivacurium

['Cardiac disorders']

Additional Data: ['approved']



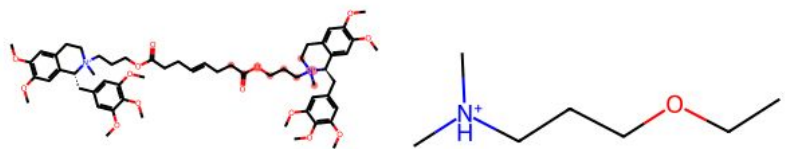

mivacurium

['Cardiac disorders']

Additional Data: ['approved']

**Figure S2:** Hits from DrugBank compounds containing structural alerts from the top 6 presented in Figure 4(b).

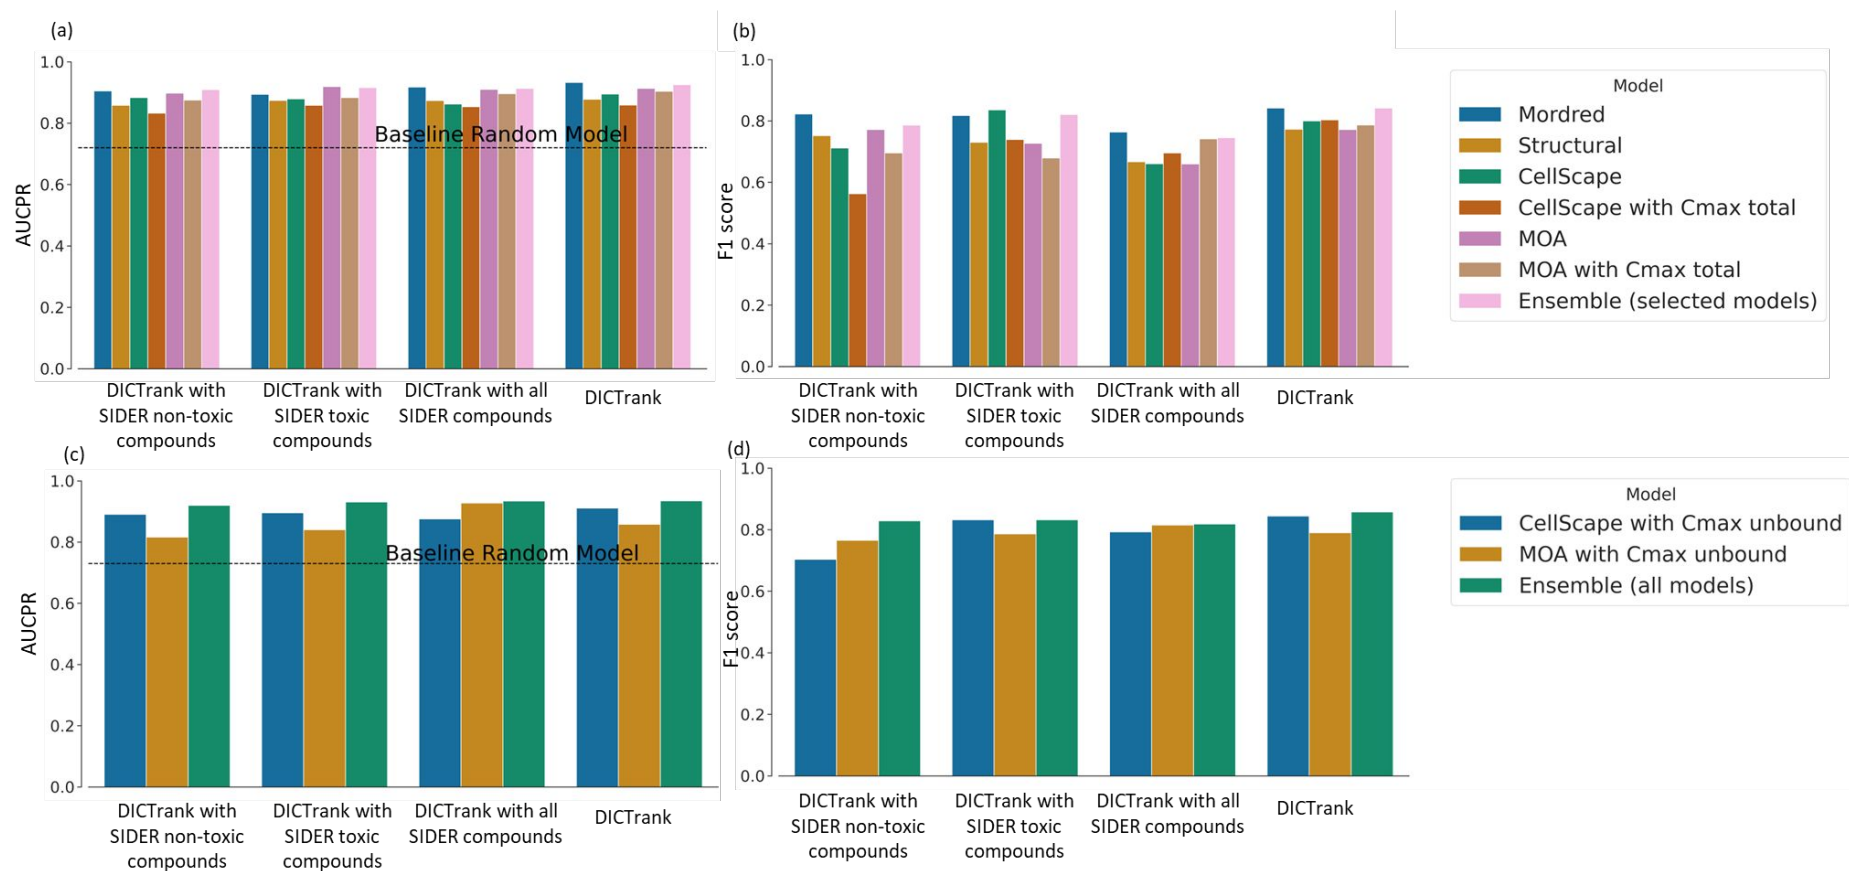

**Figure S3:** Evaluation metrics for models developed in this study using a larger external test set of 90 compounds evaluated using (a) AUCPR and (b) F1 scores, and for models using a subset of the external test set with 78 compounds evaluated using (c) AUCPR and (d) F1 scores
